# Supplementary material for: Genome-wide analysis of radiation-induced mutations in rice ( Oryza sativa L. ssp. indica )
Source: Royal Society of Chemistry journal article supplement (doi:10.1039/c3mb70349e), 2014-01-10
Supplement: c3mb70349e.pdf [file c3mb70349e.pdf]

## Supporting Information

Table S1: PCR primers and sequencing validation.

Table S2: Statistics of SNP distribution.

Table S2-1: SNP distribution in Red-1 rice chromosomes.

Table S2-2: SNP distribution in DNA domain.

Table S3: Indel distribution in Red-1 rice chromosomes.

Table S4: Indel distribution and clustering in Red-1 rice chromosomes.

Table S4-1: Clustering of the Deletion distribution in protein families.

Table S4-2: Clustering of the Insertion distribution in protein families.

Table S5: Clustering of structural variation distribution in protein families of Red-1 rice.

Table S6: Mutative gene in Red-1 rice.
